# Supplementary material for: Neural Mechanisms of Frustration in Chronically Irritable Children
Source: Atypon-hosted journal article supplement (doi:10.1176/appi.ajp.2013.12070917), 2013-06-04
Supplement: 1186_ds001.pdf [file 1186_ds001.pdf]

## Supplementary Tables

Table S1. Analysis of covariance results comparing accuracy rates and reaction times made by youths with severe mood dysregulation and healthy comparison children

| Variable      | Effect                  | <i>F</i> | <i>df</i> | <i>p</i> < | post-hoc results*                                                                                 |
|---------------|-------------------------|----------|-----------|------------|---------------------------------------------------------------------------------------------------|
| Accuracy      |                         |          |           |            |                                                                                                   |
|               | Time                    | 36.65    | 5,195     | .001       | non-frustration > frustration                                                                     |
|               | Validity                | 97.10    | 1,39      | .001       | valid > invalid                                                                                   |
|               | Time x Validity         | 30.05    | 5,195     | .001       |                                                                                                   |
| Response Time |                         |          |           |            |                                                                                                   |
|               | Time                    | 7.25     | 5,195     | .005       | Game 3, run 1 < all non-frustration blocks; Game 2, block 2 > Game 2, block 1 and Game 3 runs 1-3 |
|               | Validity                | 101.58   | 1,39      | .001       | valid < invalid                                                                                   |
|               | Time x Validity         | 7.67     | 5,195     | .001       |                                                                                                   |
|               | Validity x Group        | 3.78     | 1,39      | <.07       |                                                                                                   |
|               | Time x Validity x Group | 2.41     | 5,195     | <.07       |                                                                                                   |

*note:* Analyses were conducted after covarying participant sex.

\* indicates significant ( $p < .05$ ) differences between conditions

TABLE S2. Significant findings from the whole-brain fMRI analysis ( $p < .001$ ;  $k \geq 37$ )

| Effect    | Area of Activation        | Side | Cluster Size† | Talairach Coordinates |     |    | BA |
|-----------|---------------------------|------|---------------|-----------------------|-----|----|----|
|           |                           |      |               | x                     | y   | z  |    |
| Group     | anterior cingulate cortex | L    | 61            | -19                   | 35  | 14 | 32 |
| Feedback  | inferior frontal gyrus    | L    | 14,072        | -40                   | 47  | 2  | 10 |
| Condition | lingual gyrus             | R/L  | 936           | -1                    | -76 | 2  | 18 |
|           | inferior parietal lobule  | L    | 338           | -55                   | -55 | 38 | 40 |
|           | precentralgyrus           | R    | 223           | 14                    | -28 | 62 | 4  |
|           | superior frontal gyrus    | L    | 178           | -25                   | 38  | 32 | 9  |
|           | superior temporal gyrus   | R    | 79            | 62                    | -46 | 20 | 22 |
|           | superior frontal gyrus    | R    | 76            | 17                    | 38  | 35 | 9  |
|           | middle occipital gyrus    | L    | 54            | -31                   | -85 | 11 | 19 |

*Note:* area of activation, x, y, and z coordinates and  $F$  and  $p$  statistics refer to the voxel with maximum signal intensity

Table S3. Significant Pearson correlations between affect ratings and behavioral performance during frustration and neural activation in response to negative feedback for youths with severe mood dysregulation and healthy comparison children

| Variable                                                   | Severe Mood Dysregulation              |     | Healthy Comparison Children            |     |                         |     |                        |      |
|------------------------------------------------------------|----------------------------------------|-----|----------------------------------------|-----|-------------------------|-----|------------------------|------|
|                                                            | Self-Reported Frustration <sup>a</sup> |     | Self-Reported Frustration <sup>a</sup> |     | ARI-parent <sup>b</sup> |     | ARI-child <sup>c</sup> |      |
|                                                            | r                                      | p < | r                                      | p < | r                       | p < | r                      | p <  |
| accuracy valid trials                                      | --                                     | --  | --                                     | --  | -.46                    | .05 | --                     | --   |
| left amygdala                                              | --                                     | --  | -.49                                   | .02 | --                      | --  | --                     | --   |
| left supramarginal gyrus & <u>inferior parietal lobule</u> | -.49                                   | .03 | --                                     | --  | --                      | --  | --                     | --   |
| left insula                                                | --                                     | --  | -.46                                   | .03 | --                      | --  | --                     | --   |
| right supramarginal gyrus                                  | -.47                                   | .05 | --                                     | --  | --                      | --  | --                     | --   |
| left insula                                                | --                                     | --  | -.43                                   | .04 | --                      | --  | --                     | --   |
| left parahippocampal gyrus                                 | -.50                                   | .03 | -.51                                   | .02 | --                      | --  | -.78                   | .001 |
| left pre/postcentral gyrus                                 | --                                     | --  | -.49                                   | .02 | --                      | --  | --                     | --   |
| right precuneus                                            | --                                     | --  | -.42                                   | .05 | --                      | --  | --                     | --   |
| left cingulate/ thalamus/ caudate                          | --                                     | --  | -.46                                   | .03 | --                      | --  | --                     | --   |

<sup>a</sup>average self reported frustration after each run of Game 3.

<sup>b</sup>Child's irritability over the prior 6 months as reported by parent (ARI-parent)

<sup>c</sup>Child's irritability over the prior 6 months as reported by child (ARI-child)
